# Supplementary material for: Adaptation to Fluconazole via Aneuploidy Enables Cross-Adaptation to Amphotericin B and Flucytosine in Cryptococcus neoformans
Source: PubMed Central journal article supplement (PMC8557924; doi:10.1128/spectrum.00723-21), 2021-09-29

## Supplemental materials

### **Figure S1. Karyotypes of all colonies selected on fluconazole**

Karyotypes of parent strain H99 and all 39 sequenced colonies, (with their isolate number as indicated) were visualized using YMAP (1). The chromosome copy number is indicated as a  $\log_2$  ratio relative to the haploid H99 reference strain on the y axis, with 1 copy at the midline, clipped to show a maximum of 2 copies. The x axis shows the positions of the reads on each chromosome, mapped relative to reference strain H99.

### **Figure S2. Spot assays detect growth in the presence of FLC**

All 39 isolates were diluted in 10x steps from  $10^7$  cells/ml to  $10^5$  cells/ml (from high to low cell density as indicated by the black triangle) on YPD plates supplemented with FLC concentrations as indicated. Plates were incubated at 30°C for 3 days and photographed.

### **Reference**

1. Abbey DA, Funt J, Lurie-Weinberger MN, Thompson DA, Regev A, Myers CL, Berman J. 2014. YMAP: a pipeline for visualization of copy number variation and loss of heterozygosity in eukaryotic pathogens. *Genome Med* 6:100.

Figure S1

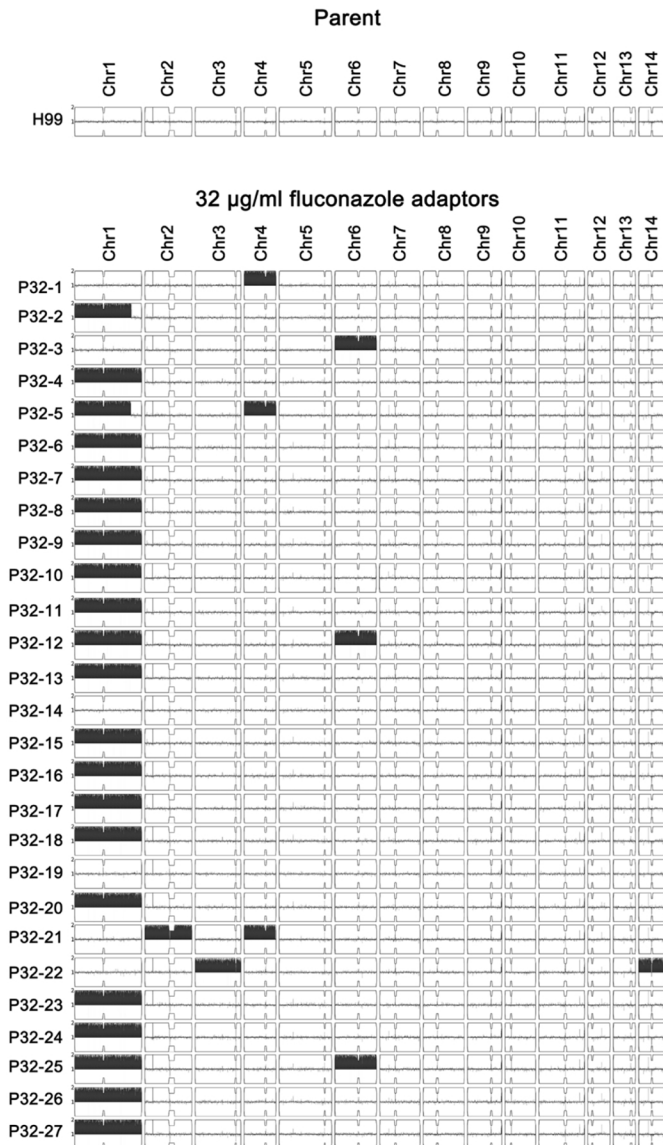

### 64 µg/ml fluconazole adaptors

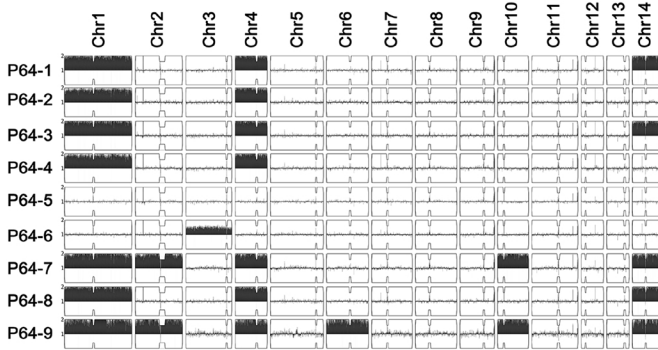

### 128 µg/ml fluconazole adaptors

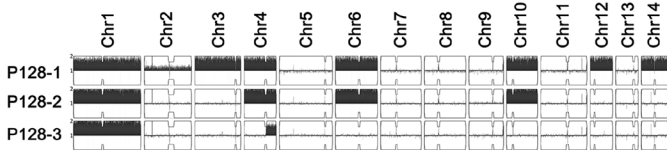

32  $\mu\text{g/ml}$  fluconazole adaptors

Figure S2

64  $\mu\text{g/ml}$  fluconazole adaptors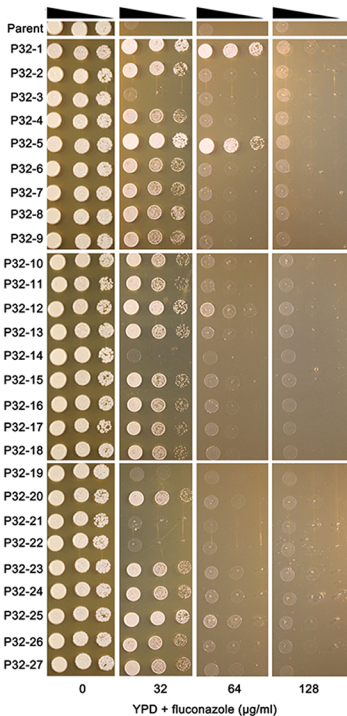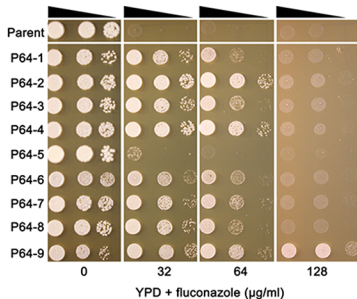128  $\mu\text{g/ml}$  fluconazole adaptors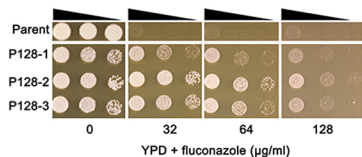

Supplement: spectrum00723-21_supp_1_seq2.pdf [file spectrum00723-21_supp_1_seq2.pdf]
